# Supplementary material
Source: HighWire-hosted journal article supplement (https://cmaj.ca/highwire/filestream/149707/field_highwire_adjunct_files/2/230492-res-3-at.pdf)
Supplement: 230492-res-3-at.pdf [file 230492-res-3-at.pdf]

**Appendix 3.** Healthcare utilization and outcomes for VUC prompt referrals who did NOT present to ED within 72hrs.

| <b>Patients referred to the ED by VUC but did not show up<br/>N=669/2,931 (22.83%)</b> |              |
|----------------------------------------------------------------------------------------|--------------|
| <b>ED VISIT, IN-PERSON</b>                                                             |              |
| Within 72hr of index VUC visit                                                         | 0 (0.00%)    |
| Within 7d of index VUC visit                                                           | 40 (5.98%)   |
| Within 30d of index VUC visit                                                          | 96 (14.35%)  |
| <b>VUC REVISIT</b>                                                                     |              |
| Within 72hr of index VUC visit                                                         | 24 (3.59%)   |
| Within 7d of index VUC visit                                                           | 38 (5.68%)   |
| Within 30d of index VUC visit                                                          | 56 (8.37%)   |
| <b>HOSPITALIZATIONS</b>                                                                |              |
| Within 72hr of index VUC visit                                                         | ^1 - 5       |
| Within 7d of index VUC visit                                                           | 8 (1.2%)     |
| Within 30d of index VUC visit                                                          | 22 (3.29%)   |
| <b>PRIMARY CARE VISITS</b>                                                             |              |
| Visit on same day as index VUC visit*                                                  | 271 (40.51%) |
| Within 7d of index VUC visit (excluding index date)                                    | 218 (32.59%) |
| Within 30d of index VUC visit (excluding index date)                                   | 350 (52.32%) |
| <b>SPECIALIST VISITS</b>                                                               |              |
| Visit on same day as index VUC visit*                                                  | 161 (24.07%) |
| Within 7d of index VUC visit (excluding index date)                                    | 123 (18.39%) |
| Within 30d of index VUC visit (excluding index date)                                   | 265 (39.61%) |
| <b>DEATH</b>                                                                           |              |
| Within 30d of index VUC visit                                                          | ^1 - 5       |

\*Temporality is unknown between the primary care visit, specialist visit and VUC visit.

^ Cells are suppressed to protect patient privacy

Where: ED = emergency department; VUC = virtual urgent care; SD = standard deviation.
